# Supplementary material
Source: PubMed Central journal article supplement (PMC3748948)
Supplement: NIHMS436755-supplement-1.pdf [file NIHMS436755-supplement-1.pdf]

## SUPPLEMENTARY MATERIALS.

### Supplementary text: Analysis of deep sequencing data.

#### Randomized PAM

For the randomized PAM experiment 3,429,406 reads were obtained for crR6 and 3,253,998 for R6. It is expected that only half of them will correspond to the PAM-target while the other half will sequence the other end of the PCR product. 1,623,008 of the crR6 reads and 1,537,131 of the R6 reads carried an error-free target sequence. The occurrence of each possible PAM among these reads is shown in supplementary file. To estimate the functionality of a PAM, its relative proportion in the crR6 sample over the R6 sample was computed and is denoted  $r_{ijklm}$  where  $I,j,k,l,m$  are one of the 4 possible bases. The following statistical model was constructed:

$$\log(r_{ijklm}) = \mu + b2_i + b3_j + b4_k + b2b3_{ij} + b3b4_{jk} + \varepsilon_{ijklm},$$

where  $\varepsilon$  is the residual error,  $b2$  is the effect of the 2<sup>nd</sup> base of the PAM,  $b3$  of the third,  $b4$  of the fourth,  $b2b3$  is the interaction between the second and third bases,  $b3b4$  between the third and fourth bases. An analysis of variance was performed:

#### Anova table

|           | Df  | Sum Sq  | Mean Sq | F value  | Pr(>F)    |     |
|-----------|-----|---------|---------|----------|-----------|-----|
| b3        | 3   | 151.693 | 50.564  | 601.8450 | < 2.2e-16 | *** |
| b2        | 3   | 90.521  | 30.174  | 359.1454 | < 2.2e-16 | *** |
| b4        | 3   | 1.881   | 0.627   | 7.4623   | 6.070e-05 | *** |
| b3:b2     | 9   | 228.940 | 25.438  | 302.7738 | < 2.2e-16 | *** |
| b3:b4     | 9   | 3.010   | 0.334   | 3.9809   | 5.227e-05 | *** |
| Residuals | 996 | 83.680  | 0.084   |          |           |     |

When added to this model,  $b1$  or  $b5$  do not appear to be significant and other interactions than the ones included can also be discarded. The model choice was made through successive comparisons of more or less complete models using the anova method in R. Tukey's honest significance test was used to determine if pairwise differences between effects are significant.

NGGNN patterns are significantly different from all other patterns and carry the strongest effect (see table below).

In order to show that positions 1, 4 or 5 do not affect the NGGNN pattern we looked at these sequences only. Their effect appears to be normally distributed (see QQ plot below), and model comparisons using the anova method in R shows that the null model is the best one, i.e. there is no significant role of b1, b4 and b5.

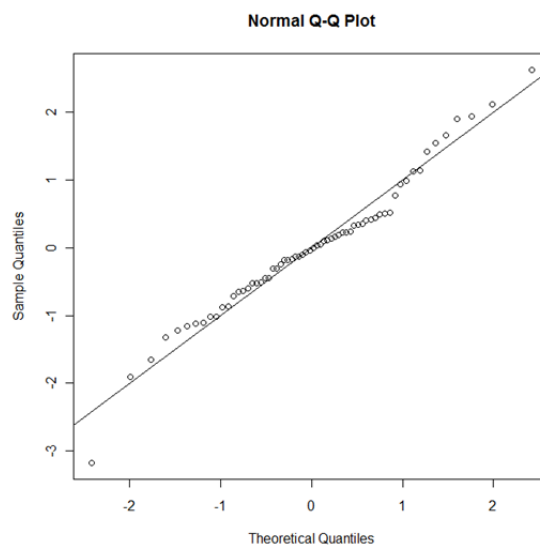

QQ plot for the NGGNN sequences

Model comparison using the anova method in R for the NGGNN sequences

```
Model 1: ratio.log ~ 1
Model 2: ratio.log ~ b1 + b4 + b5
  Res.Df  RSS Df Sum of Sq    F Pr(>F)
1     63 14.579
2     54 11.295  9     3.2836 1.7443 0.1013
```

**Partial interference of NAGNN and NNGGN patterns**

NAGNN patterns are significantly different from all other patterns but carry a much smaller effect than NGGNN (see Tukey's honest significance test below).

Finally, NTGGN and NCGGN patterns are similar and show significantly more CRISPR interference than NTGHN and NCGHN patterns (where H is A,T or C), as shown by a bonferroni adjusted pairwise student-test.

Pairwise comparisons of the effect of b4 on NYGNN sequences using t tests with pooled SD

Data: b4

|   | A       | C       | G       |
|---|---------|---------|---------|
| C | 1.00    | -       | -       |
| G | 9.2e-05 | 2.4e-06 | -       |
| T | 0.31    | 1.00    | 1.2e-08 |

Taken together, these results allow concluding that NNGGN patterns in general produce either a complete interference in the case of NGGGN, or a partial interference in the case of NAGGN, NTGGN or NCGGN.

Tukey multiple comparisons of means

95% family-wise confidence level

\$b2:b3

|         | diff     | lwr      | upr      | p adj   |
|---------|----------|----------|----------|---------|
| G:G-A:A | -2.76475 | -2.94075 | -2.58875 | <1E -07 |
| G:G-C:A | -2.79911 | -2.97511 | -2.62311 | <1E -07 |
| G:G-T:A | -2.7809  | -2.9569  | -2.6049  | <1E -07 |
| G:G-A:C | -2.81643 | -2.99244 | -2.64043 | <1E -07 |
| G:G-C:C | -2.77903 | -2.95504 | -2.60303 | <1E -07 |
| G:G-G:C | -2.64867 | -2.82468 | -2.47267 | <1E -07 |
| G:G-T:C | -2.79718 | -2.97319 | -2.62118 | <1E -07 |
| G:G-A:G | -2.67068 | -2.84668 | -2.49468 | <1E -07 |
| G:G-C:G | -2.73525 | -2.91125 | -2.55925 | <1E -07 |
| G:G-T:G | -2.7976  | -2.62159 | -2.9736  | <1E -07 |
| G:G-A:T | -2.76727 | -2.59127 | -2.94328 | <1E -07 |
| G:G-C:T | -2.84114 | -2.66513 | -3.01714 | <1E -07 |
| G:G-G:T | -2.76409 | -2.58809 | -2.94009 | <1E -07 |
| G:G-T:T | -2.76781 | -2.59181 | -2.94381 | <1E -07 |
| G:G-G:A | -2.13964 | -2.31565 | -1.96364 | <1E -07 |
| G:A-A:A | -0.62511 | -0.80111 | -0.4491  | <1E -07 |

|         |          |          |          |         |
|---------|----------|----------|----------|---------|
| G:A-C:A | -0.65947 | -0.83547 | -0.48346 | <1E -07 |
| G:A-T:A | -0.64126 | -0.46525 | -0.81726 | <1E -07 |
| G:A-A:C | -0.67679 | -0.50078 | -0.85279 | <1E -07 |
| G:A-C:C | -0.63939 | -0.46339 | -0.81539 | <1E -07 |
| G:A-G:C | -0.50903 | -0.33303 | -0.68503 | <1E -07 |
| G:A-T:C | -0.65754 | -0.48154 | -0.83354 | <1E -07 |
| G:A-A:G | -0.53104 | -0.35503 | -0.70704 | <1E -07 |
| G:A-C:G | -0.59561 | -0.4196  | -0.77161 | <1E -07 |
| G:A-T:G | -0.65795 | -0.48195 | -0.83396 | <1E -07 |
| G:A-A:T | -0.62763 | -0.45163 | -0.80363 | <1E -07 |
| G:A-C:T | -0.70149 | -0.52549 | -0.8775  | <1E -07 |
| G:A-G:T | -0.62445 | -0.44844 | -0.80045 | <1E -07 |
| G:A-T:T | -0.62817 | -0.45216 | -0.80417 | <1E -07 |

\$b3:b4

|         | diff     | lwr      | upr      | p adj    |
|---------|----------|----------|----------|----------|
| G:G-G:A | -0.33532 | -0.51133 | -0.15932 | <1E-07   |
| G:G-G:C | -0.18118 | -0.35719 | -0.00518 | 0.036087 |
| G:G-G:T | -0.31626 | -0.14026 | -0.49226 | <1E-07   |

## Randomized target

For the randomized target experiment 540,726 reads were obtained for crR6 and 753,570 for R6. As before, only half of the reads are expected to sequence the interesting end of the PCR product. After filtering for reads that carry a target that is error-free or with a single point mutation, 217,656 and 353,141 reads remained for crR6 and R6 respectively. The relative proportion of each mutant in the crR6 sample over the R6 sample was computed (figure 2C). All mutations outside of the seed sequence (13-20 bases away from the PAM) show full interference. Those sequences were used as a reference to determine if other mutations inside the seed sequence can be said to significantly disrupt interference. A normal distribution was fitted to these sequences using the `fitdistr` function of the MASS R package. The 0.99 quantile of the fitted distribution is shown as a dotted line in Fig. 2C.

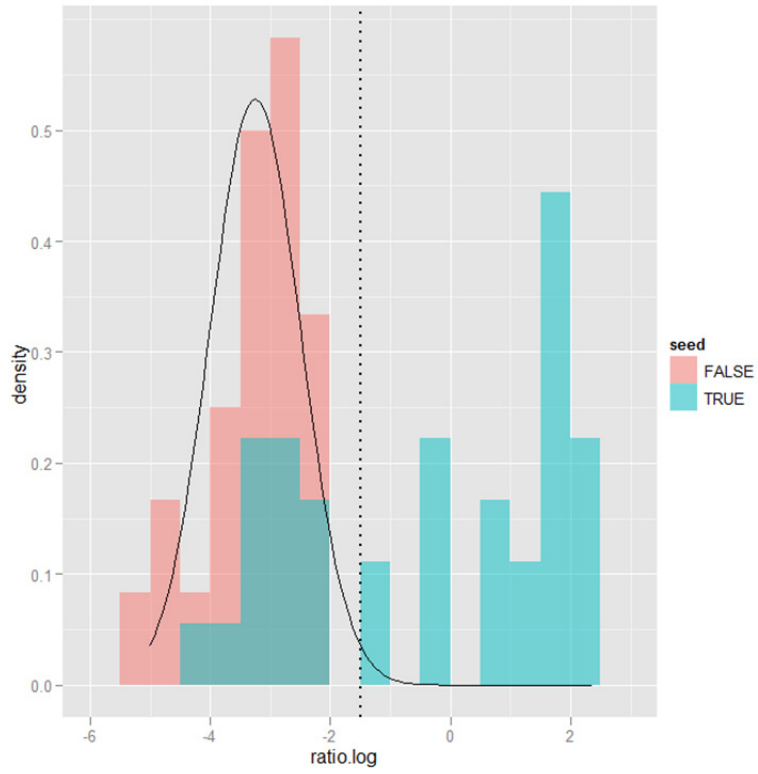

*Histogram of the data density with fitted normal distribution (black line) and .99 quantile (dotted line)*

**Supplementary figures.**

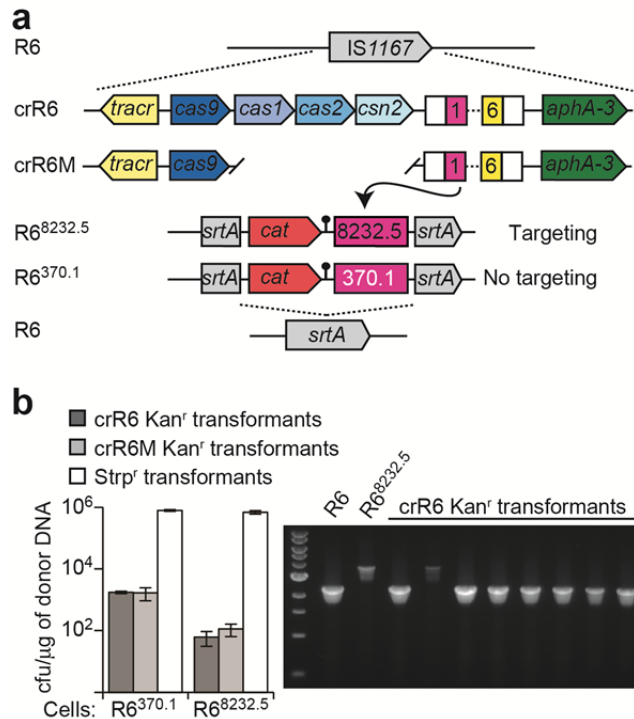

**Supplementary Fig. 1.** Transformation of crR6 genomic DNA leads to editing of the targeted locus **(a)** The *IS1167* element of *S. pneumoniae* R6 was replaced by the CRISPR01 locus of *S. pyogenes* SF370 to generate crR6 strain. This locus encodes for the Cas9 nuclease, a CRISPR array with six spacers, the tracrRNA that is required for crRNA biogenesis and Cas1, Cas2 and Csn2, proteins not necessary for targeting. Strain crR6M contains a minimal functional CRISPR system without *cas1*, *cas2* and *csn2*. The *aphA-3* gene encodes kanamycin resistance. Protospacers from the streptococcal bacteriophages  $\phi$ 8232.5 and  $\phi$ 370.1 were fused to a chloramphenicol resistance gene (*cat*) and integrated in the *srtA* gene of strain R6 to generate strains R6<sup>8232.5</sup> and R6<sup>370.1</sup>. **(b)** Left panel: Transformation of crR6 and crR6M genomic DNA in R6<sup>8232.5</sup> and R6<sup>370.1</sup>. As a control of cell competence a streptomycin resistant gene was also transformed. Right panel: PCR analysis of 8 R6<sup>8232.5</sup> transformants with crR6 genomic DNA. Primers that amplify the *srtA* locus were used for PCR. 7/8 genotyped colonies replaced the R6<sup>8232.5</sup> *srtA* locus by the WT locus from the crR6 genomic DNA.

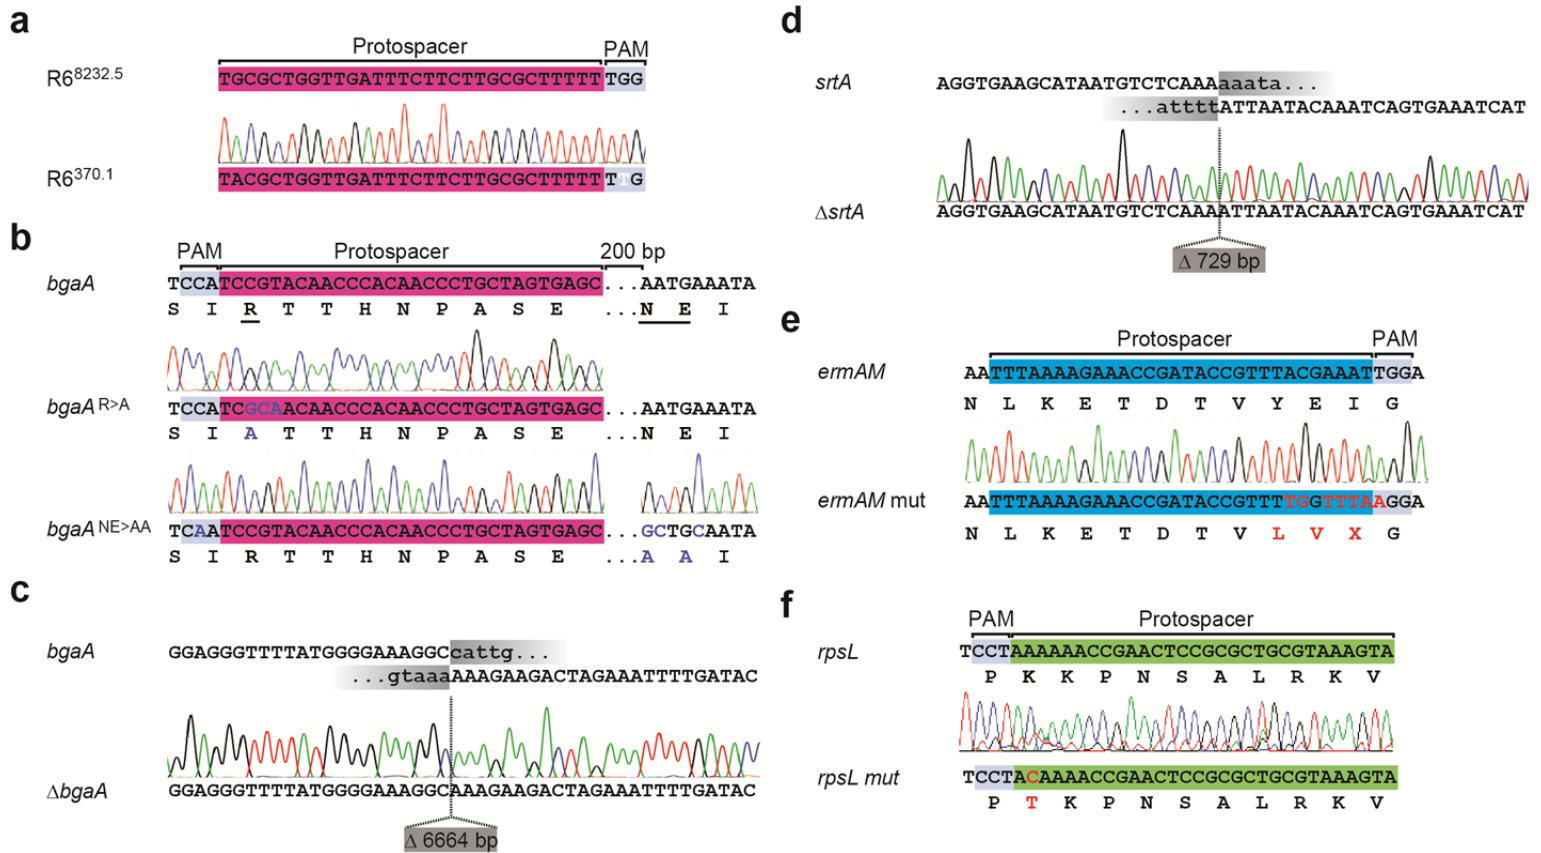

**Supplementary Fig. 2.** Chromatograms of DNA sequences of edited cells obtained in this study. In all cases the wild-type and mutant protospacer and PAM sequences (or their reverse complement) are indicated. When relevant, the amino acid sequence encoded by the protospacer is provided. For each editing experiment, all strains for which PCR and restriction analysis corroborated the introduction of the desired modification were sequenced. A representative chromatogram is shown. **(a)** Chromatogram for the introduction of a PAM mutation into the R6<sup>8232.5</sup> target (Fig. 1d). **(b)** Chromatograms for the introduction of the R>A and NE>AA mutations into  $\beta$ -galactosidase (*bgaA*) (Fig. 3c). **(c)** Chromatogram for the introduction of a 6664 bp deletion within *bgaA* ORF (Figs. 3c and 3f). The dotted line indicates the limits of the deletion. **(d)** Chromatogram for the introduction of a 729 bp deletion within *srtA* ORF (Fig. 3f). The dotted line indicates the limits of the deletion. **(e)** Chromatograms for the generation of a premature stop codon within *ermAM* (Supplementary Fig. 6). **(f)** *rpsL* editing in *E. coli* (Fig. 5).

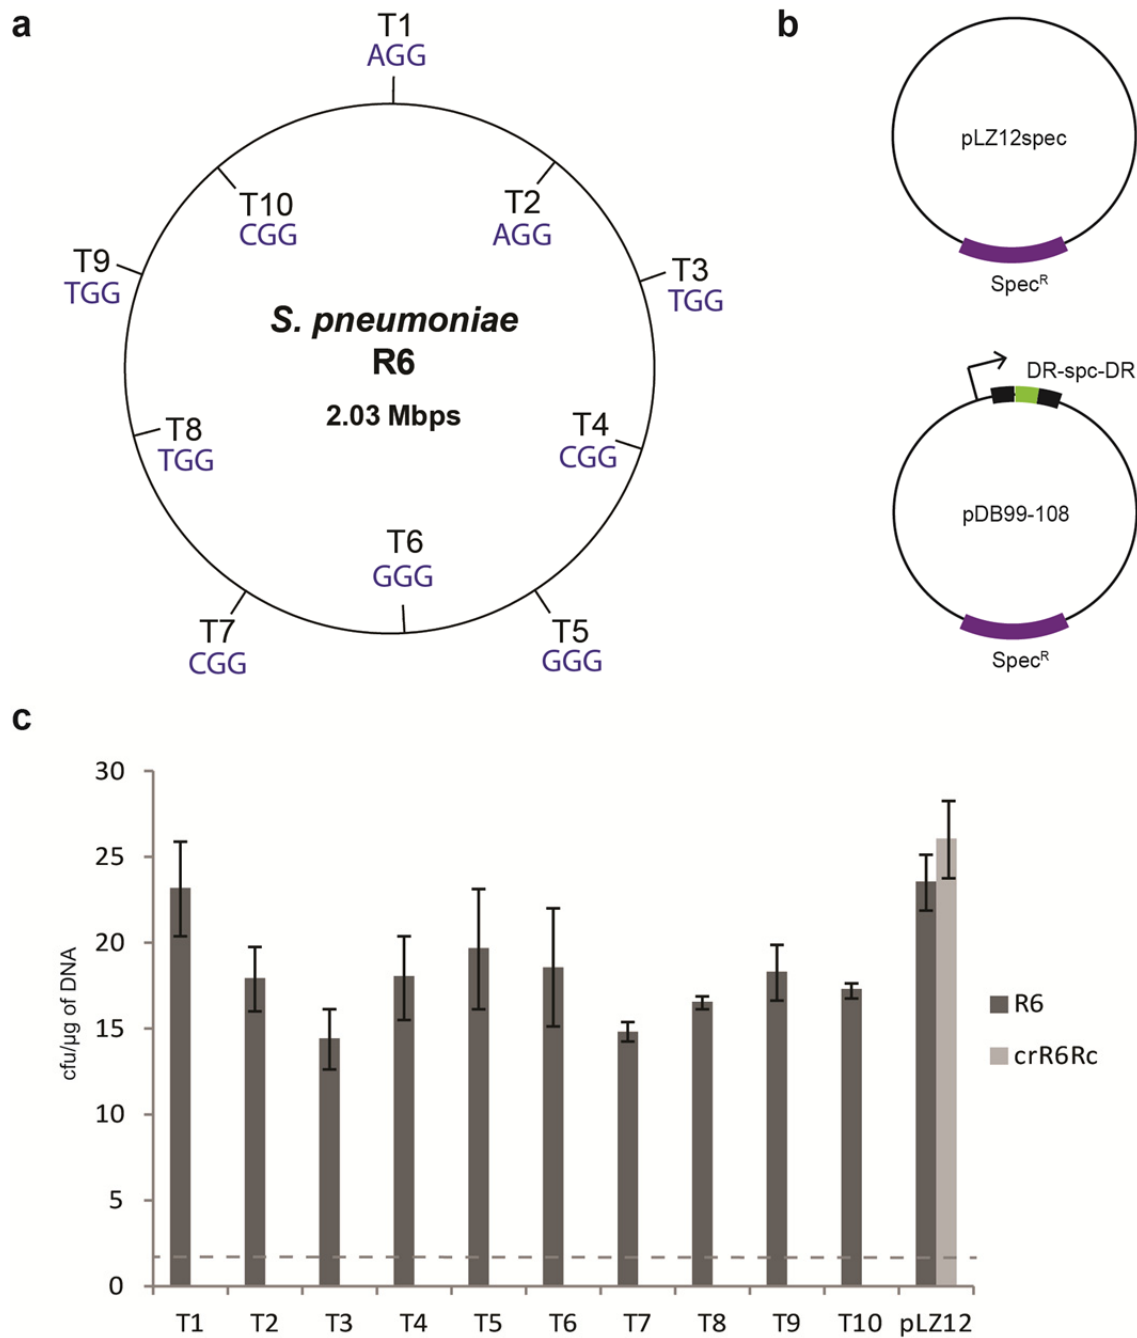

**Supplementary Fig. 3.** CRISPR immunity against random *S. pneumoniae* targets containing different PAMs. **(a)** Position of the 10 random targets on the *S. pneumoniae* R6 genome. The chosen targets have different PAMs and are on both strands. **(b)** Spacers corresponding to the targets were cloned in a minimal CRISPR array on plasmid pLZ12 and transformed into strain crR6Rc, which supplies the processing and targeting machinery in trans. **(c)** Transformation efficiency of the different plasmids in strain R6 and crR6Rc. No colonies were recovered for the transformation of pDB99-108 (T1-T10) in crR6Rc. The dashed line represents limit of detection of the assay.



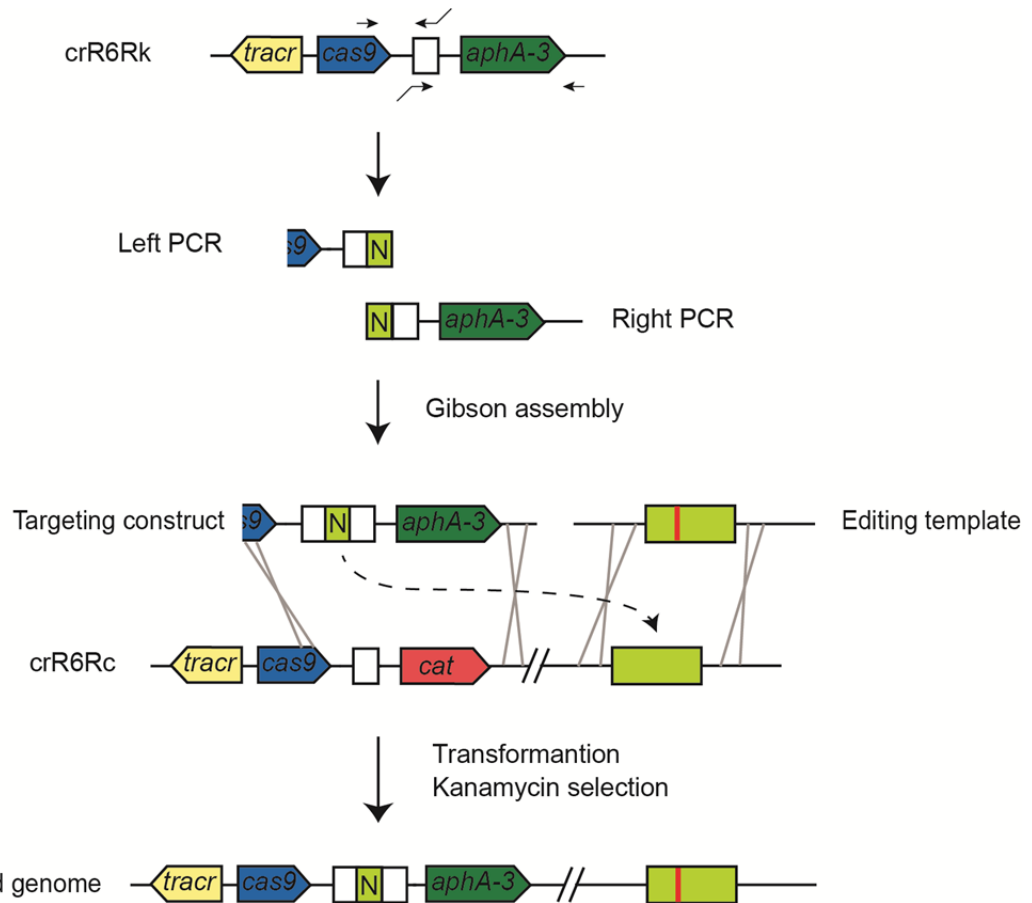

**Supplementary Fig. 4.** A general scheme for targeted genome editing. To facilitate targeted genome editing, crR6M was further engineered to contain *tracr*RNA, Cas9 and only one repeat of the CRISPR array followed by kanamycin resistance marker (*aphA-3*), generating strain crR6Rk. DNA from this strain is used as a template for PCR with primers designed to introduce a new spacer (green box designated with N). The left and right PCRs are assembled using the Gibson method to create the targeting construct. Both the targeting and editing constructs are then transformed into strain crR6Rc, which is a strain equivalent to crR6Rk but has the kanamycin resistance marker replaced by a chloramphenicol resistance marker (*cat*). About 90 % of the kanamycin-resistant transformants contain the desired mutation.

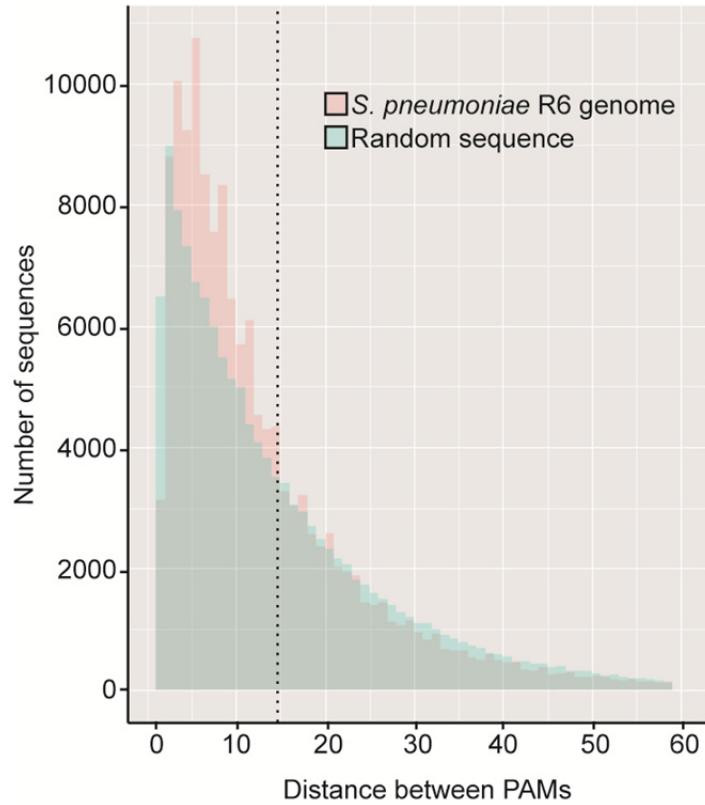

**Supplementary Fig. 5.** Distribution of distances between PAMs. NGG and CCN are considered to be valid PAMs. Data is shown for the *S. pneumoniae* R6 genome as well as for a random sequence of the same length and with the same GC-content (39.7 %). The dotted line represents the average distance (12) between PAMs in the R6 genome.

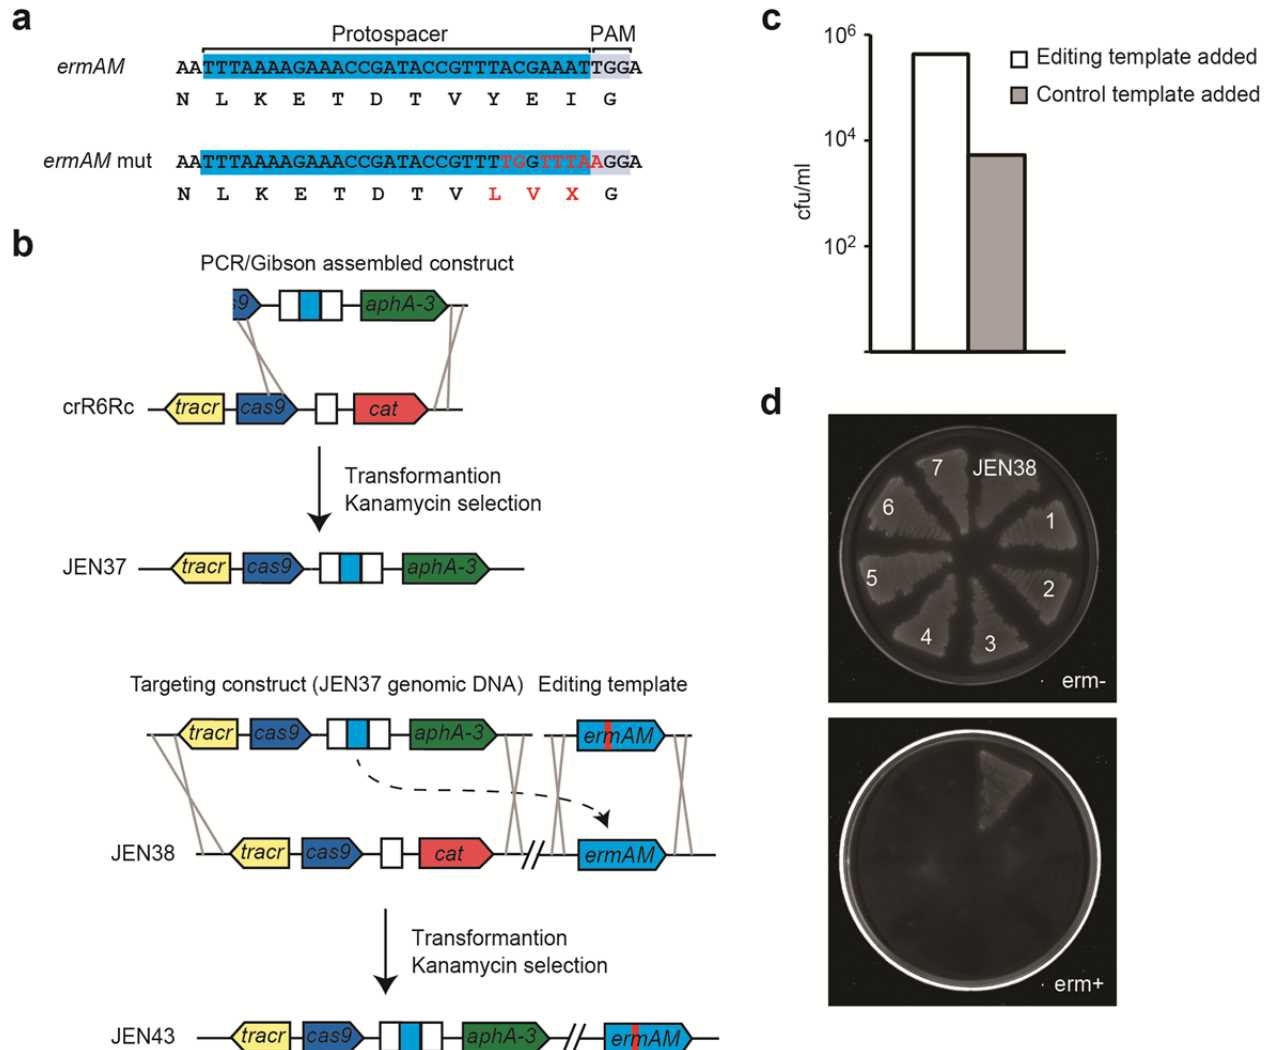

**Supplementary Fig. 6.** CRISPR-mediated editing of the *ermAM* locus using genomic DNA as targeting construct. To use genomic DNA as targeting construct it is necessary to avoid CRISPR autoimmunity, and therefore a spacer against a sequence not present in the chromosome must be used (in this case the *ermAM* erythromycin resistance gene). **(a)** Nucleotide and amino acid sequences of the wild-type and mutated (red letters) *ermAM* gene. The protospacer and PAM sequences are shown. **(b)** A schematic for CRISPR-mediated editing of the *ermAM* locus using genomic DNA. A construct carrying an *ermAM*-targeting spacer (blue box) is made by PCR and Gibson assembly, and transformed into strain crR6Rc, generating strain JEN37. The genomic DNA of JEN37 is then used as a targeting construct, and is co-transformed with the editing template into JEN38, a strain in which the *srtA* gene was replaced by a wild-type copy of *ermAM*. Kanamycin-resistant transformants contain the edited genotype (JEN43). **(c)** Number of kanamycin-resistant cells obtained after co-transformation of targeting and editing or control templates. In the presence of the control template  $5.4 \times 10^3$  cfu/ml were obtained, and  $4.3 \times 10^5$  cfu/ml when the editing template was used. This difference indicates an editing efficiency of about 99 %  $[(4.3 \times 10^5 - 5.4 \times 10^3) / 4.3 \times 10^5]$ . **(d)** To check for the presence of edited cells seven kanamycin-resistant clones and JEN38 were streaked on agar plates with (*erm*<sup>+</sup>) or without (*erm*<sup>-</sup>) erythromycin. Only the positive control displayed resistance to erythromycin. The *ermAM* mut genotype of one of these transformants was also verified by DNA sequencing (Supplementary Fig. 1E).

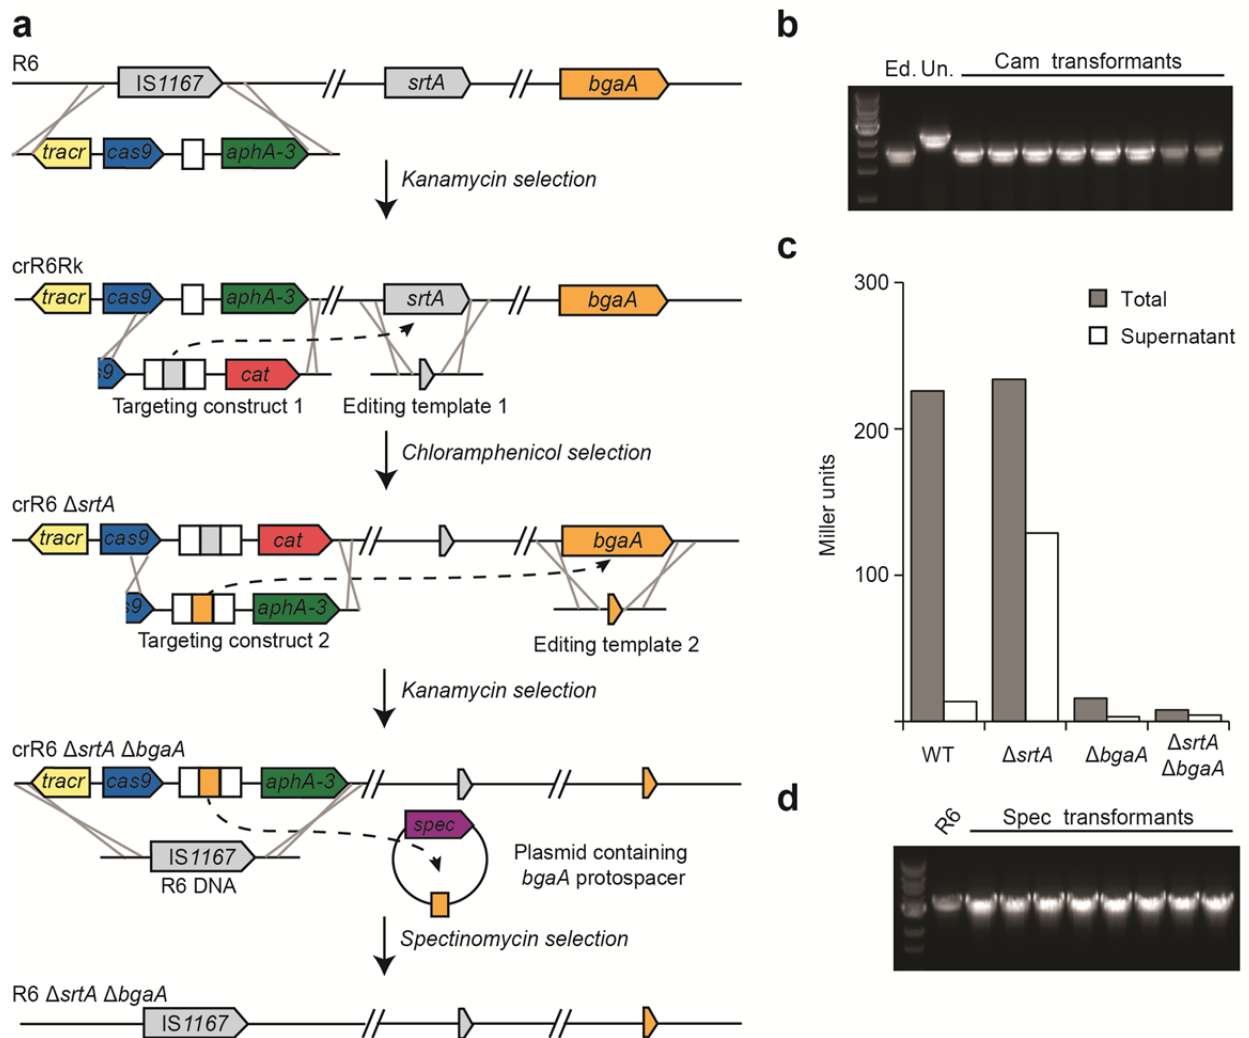

**Supplementary Fig. 7.** Sequential introduction of mutations by CRISPR-mediated genome editing. **(a)** A schematic for sequential introduction of mutations by CRISPR-mediated genome editing. First, R6 is engineered to generate crR6Rk. crR6Rk is co-transformed with a *srtA*-targeting construct fused to *cat* for chloramphenicol selection of edited cells, along with an editing construct for a  $\Delta srtA$  in-frame deletion. Strain crR6  $\Delta srtA$  is generated by selection on chloramphenicol. Subsequently, the  $\Delta srtA$  strain is co-transformed with a *bgaA*-targeting construct fused to *aphA-3* for kanamycin selection of edited cells, and an editing construct containing a  $\Delta bgaA$  in-frame deletion. Finally, the engineered CRISPR locus can be erased from the chromosome by first co-transforming R6 DNA containing the wild-type *IS1167* locus and a plasmid carrying a *bgaA* protospacer (pDB97), and selection on spectinomycin. **(b)** PCR analysis for 8 chloramphenicol (Cam)-resistant transformants to detect the deletion in the *srtA* locus. **(c)**  $\beta$ -galactosidase activity as measured by Miller assay. In *S. pneumoniae*, this enzyme is anchored to the cell wall by sortase A. Deletion of the *srtA* gene results in the release of  $\beta$ -galactosidase into the supernatant.  $\Delta bgaA$  mutants show no activity. **(d)** PCR analysis for 8 spectinomycin (Spec)-resistant transformants to detect the replacement of the CRISPR locus by wild-type *IS1167*.

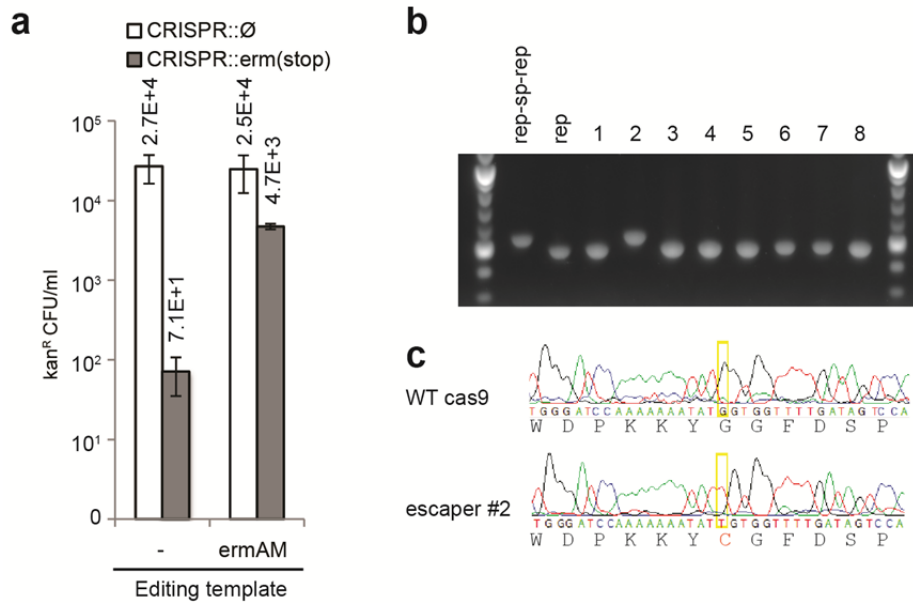

**Supplementary Fig. 8.** Background mutation frequency of CRISPR in *S. pneumoniae*. **(a)** Transformation of the CRISPR:: $\emptyset$  or CRISPR::*erm*(stop) targeting constructs in JEN53, with or without the *ermAM* editing template. The difference in kan<sup>R</sup> CFU between CRISPR:: $\emptyset$  and CRISPR::*erm*(stop) indicates that Cas9 cleavage kills non-edited cells. Mutants that escape CRISPR interference in the absence of editing template are observed at a frequency of  $3 \times 10^{-3}$ . **(b)** PCR analysis of the CRISPR locus of escapers shows that 7/8 have a spacer deletion. **(c)** Escaper #2 carries a point mutation in *cas9*.

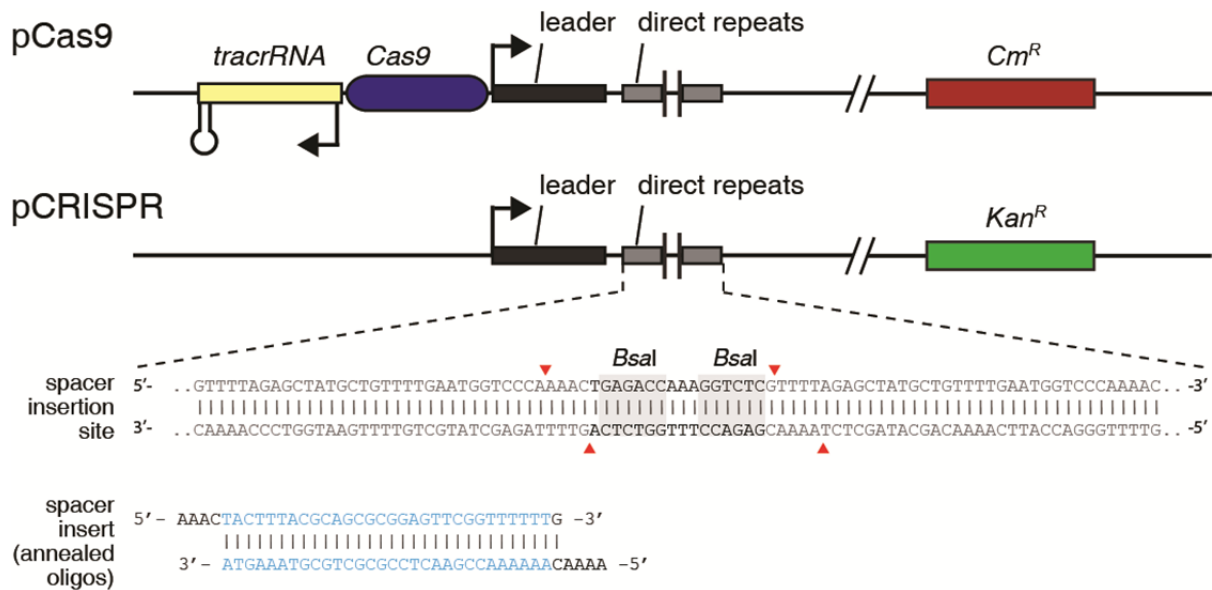

**Supplementary Fig. 9.** The essential elements of the *S. pyogenes* CRISPR locus 1 are reconstituted in *E. coli* using pCas9. The plasmid contains tracrRNA, Cas9, as well as a leader sequence driving the crRNA array. The pCRISPR plasmid contains the leader and the array only. Spacers can be inserted into the crRNA array between *BsaI* sites using annealed oligonucleotides. Oligonucleotide design is shown at bottom. pCas9 carries chloramphenicol resistance (Cm<sup>R</sup>) and is based on the low-copy pACYC184 plasmid backbone. pCRISPR is based on the high-copy number pZE21 plasmid. Two plasmids are required because a pCRISPR plasmid containing a spacer targeting the *E. coli* chromosome cannot be constructed using this organism as a cloning host if Cas9 is also present (it will kill the host).

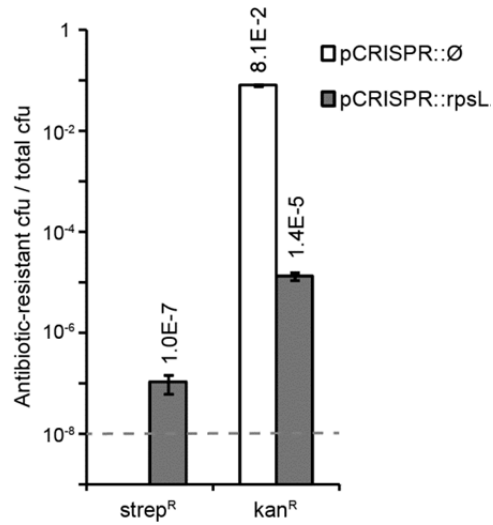

**Supplementary Fig. 10.** CRISPR-directed editing in *E. coli* MG1655. An oligonucleotide (W542) carrying a point mutation that both confers streptomycin resistance and abolishes CRISPR immunity, together with a plasmid targeting *rpsL* (pCRISPR::rpsL) or a control plasmid (pCRISPR::Ø) were co-transformed into wild-type *E. coli* strain MG1655 containing pCas9. Transformants were selected on media containing either streptomycin or kanamycin. Dashed line indicates limit of detection of the transformation assay.

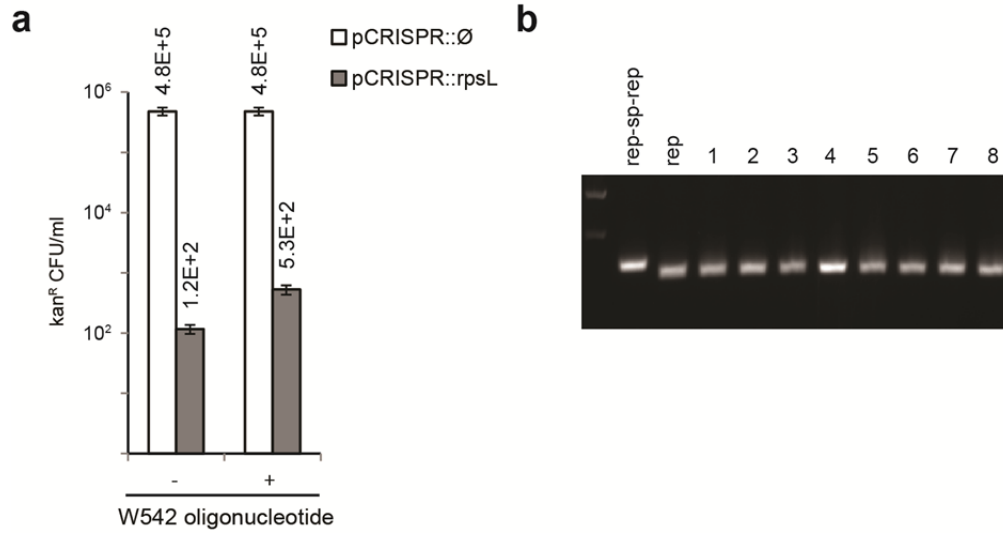

**Supplementary Fig. 11.** Background mutation frequency of CRISPR in *E. coli* HME63. **(a)** Transformation of the pCRISPR::∅ or pCRISPR::rpsL plasmids into HME63 competent cells. Mutants that escape CRISPR interference are observed at a frequency of  $2.6 \times 10^{-4}$ . **(b)** Amplification of the CRISPR array of escapers showing that 8/8 have deleted the spacer.



## Supplementary tables

**Table S1.** Relative abundance of PAM sequences in the crR6/R6 samples averaged over bases 1 and 5.

|              |   | 3rd position |      |     |      |     |      |     |      |   |
|--------------|---|--------------|------|-----|------|-----|------|-----|------|---|
|              |   | A            |      | C   |      | G   |      | T   |      |   |
| 2nd position | A | AAA          | 1.04 | ACA | 1.12 | AGA | 0.73 | ATA | 1.10 | A |
|              |   | AAC          | 1.07 | ACC | 1.04 | AGC | 0.64 | ATC | 0.97 | C |
|              |   | AAG          | 1.00 | ACG | 1.09 | AGG | 0.61 | ATG | 1.07 | G |
|              |   | AAT          | 0.98 | ACT | 1.02 | AGT | 0.65 | ATT | 1.01 | T |
|              | C | CAA          | 1.05 | CCA | 1.05 | CGA | 0.99 | CTA | 1.07 | A |
|              |   | CAC          | 1.04 | CCC | 1.02 | CGC | 1.08 | CTC | 1.04 | C |
|              |   | CAG          | 1.08 | CCG | 1.08 | CGG | 0.81 | CTG | 1.05 | G |
|              |   | CAT          | 1.13 | CCT | 1.05 | CGT | 1.07 | CTT | 1.08 | T |
|              | G | GAA          | 0.97 | GCA | 1.05 | GGA | 0.08 | GTA | 0.99 | A |
|              |   | GAC          | 0.92 | GCC | 1.00 | GGC | 0.05 | GTC | 1.15 | C |
|              |   | GAG          | 0.96 | GCG | 0.98 | GGG | 0.07 | GTG | 0.98 | G |
|              |   | GAT          | 0.98 | GCT | 0.99 | GGT | 0.06 | GTT | 1.05 | T |
|              | T | TAA          | 1.08 | TCA | 1.16 | TGA | 1.05 | TTA | 1.14 | A |
|              |   | TAC          | 1.00 | TCC | 1.08 | TGC | 1.08 | TTC | 1.05 | C |
|              |   | TAG          | 1.02 | TCG | 1.11 | TGG | 0.77 | TTG | 1.01 | G |
|              |   | TAT          | 1.01 | TCT | 1.12 | TGT | 1.21 | TTT | 1.02 | T |

**Table S2.** Primers used in this study.

| <b>Primer</b> | <b>Sequence 5'-3'</b>                                 |
|---------------|-------------------------------------------------------|
| B217          | TCCTAGCAGGATTTCTGATATTACTGTCACGTTTTAGAGCTATGCTGTTTTGA |
| B218          | GTGACAGTAATATCAGAAATCCTGCTAGGAGTTTTGGGACCATTCAAAACAGC |
| B229          | GGGTTTCAAGTCTTTGTAGCAAGAG                             |
| B230          | GCCAATGAACGGGAACCCCTTGGTC                             |
| B250          | NNNNGACGAGGCAATGGCTGAAATC                             |
| B251          | NNNNTTATTTGGCTCATATTTGCTG                             |
| B255          | CTTTACACCAATCGCTGCAACAGAC                             |
| B256          | CAAAATTTCTAGTCTTCTTTGCCTTTCCCCATAAAACCCCTCCTTA        |
| B257          | AGGGTTTTTATGGGGAAAGGC AAAAGAAGACTAGAAAATTTTGATAACC    |
| B258          | CTTACGGTGCATAAAGTCAATTTCC                             |
| B269          | TGGCTCGATTTTCAGCCATTGC                                |
| B270          | CTTTGACGAGGCAATGGCTGAAATCGAGCCAANAAAGCGCAAG           |
| B271          | CTTTGACGAGGCAATGGCTGAAATCGAGCCAANAAAGCGCAAG           |
| B272          | CTTTGACGAGGCAATGGCTGAAATCGAGCCAAAANAGCGCAAG           |
| B273          | CTTTGACGAGGCAATGGCTGAAATCGAGCCAAAAANGCGCAAG           |
| B274          | CTTTGACGAGGCAATGGCTGAAATCGAGCCAAAAAANCAGCAAG          |
| B275          | CTTTGACGAGGCAATGGCTGAAATCGAGCCAAAAAAGNGCAAG           |
| B276          | CTTTGACGAGGCAATGGCTGAAATCGAGCCAAAAAAGCNCAAGAAG        |
| B277          | CTTTGACGAGGCAATGGCTGAAATCGAGCCAAAAAAGCGNAAGAAG        |
| B278          | CTTTGACGAGGCAATGGCTGAAATCGAGCCAAAAAAGCGCNAGAAG        |
| B279          | GCGCTTTTTTTGGCTCGATTTTCAG                             |
| B280          | CAATGGCTGAAATCGAGCCAAAAAAGCGCANGAAGAAAATC             |
| B281          | CAATGGCTGAAATCGAGCCAAAAAAGCGCAANAAGAAAATC             |
| B282          | CAATGGCTGAAATCGAGCCAAAAAAGCGCAAGNAGAAAATC             |
| B283          | CAATGGCTGAAATCGAGCCAAAAAAGCGCAAGANGAAAATC             |
| B284          | CAATGGCTGAAATCGAGCCAAAAAAGCGCAAGAANAANAATC            |
| B285          | CAATGGCTGAAATCGAGCCAAAAAAGCGCAAGAAGNAATCAACC          |
| B286          | CAATGGCTGAAATCGAGCCAAAAAAGCGCAAGAAGANATCAACC          |
| B287          | CAATGGCTGAAATCGAGCCAAAAAAGCGCAAGAAGAANTCAACC          |
| B288          | CAATGGCTGAAATCGAGCCAAAAAAGCGCAAGAAGAAANCAACC          |
| B289          | CAATGGCTGAAATCGAGCCAAAAAAGCGCAAGAAGAAATNAACCAGC       |
| B290          | CAATGGCTGAAATCGAGCCAAAAAAGCGCAAGAAGAAATCNACCAGC       |
| B296          | gatccTCCATCCGTACAACCCACAACCCTGg                       |
| B297          | aattcCAGGGTTGTGGGTTGTACGGATGGAg                       |
| B298          | CATGGATCCTATTTCTTAATAACTAAAAATATGG                    |
| B299          | CATGAATTCAACTCAACAAGTCTCAGTGTGCTG                     |
| B300          | AAACATTTTTTCTCCATTTAGGAAAAAGGATGCTG                   |
| B301          | AAAACAGCATCCTTTTTCTTAAATGGAGAAAAAAT                   |

B302 AAACCTTAAATCAGTCACAAATAGCAGCAAATTTG

B303 AAAACAATTTTGTCTGCTATTTGTGACTGATTTAAG

B304 AAACCTTTTCATCATACGACCAATCTGCTTTATTTG

B305 AAAACAAATAAAGCAGATTGGTCGTATGATGAAAA

B306 AAACCTCGTCCAGAAGTTATCGTAAAAGAAAATCGAG

B307 AAAACTCGATTTCTTTTACGATAACTTCTGGACGA

B308 AAACAATCTCTCCAAGGTTTCCTTAAAAATCTCTG

B309 AAAACAGAGATTTTTAAGGAAACCTTGGAGAGATT

B310 AAACGCCATCGTCAGGAAGAAGCTATGCTTGAGTG

B311 AAAACACTCAAGCATAGCTTCTTCTGACGATGGC

B312 AAACATCTCTATACTTATTGAAAATTTCTTTGTATG

B313 AAAACATACAAAGAAATTTCAATAAGTATAGAGAT

B314 AAACCTAGCTGTGATAGTCCGCAAAACCAGCCTTCG

B315 AAAACGAAGGCTGGTTTTGCGGACTATCACAGCTA

B316 AAACATCGGAAGGTCGAGCAAGTAATTATCTTTTG

B317 AAAACAAAAGATAATTACTTGCTCGACCTTCCGAT

B318 AAACAAGATGGTATCGCAAAGTAAGTGACAATAAG

B319 AAAACTTATTGTCACTTACTTTGCGATACCATCTT

B320 GAGACCTTTGAGCTTCCGAGACTGGTCTCAGTTTTGGGACCATTCAAAACAG

B321 TGAGACCAGTCTCGGAAGCTCAAAGGTCTCGTTTTAGAGCTATGCTGTTTTG

B352 aaacTACTTTACGCAGCGCGGAGTTCGGTTTTTTg

B353 aaaacAAAAAACCGAACTCCGCGCTGCGTAAAGTA

HC008\_SP ATGCCGGTACTGCCGGGCTCTTGCGGGATTACGAAATCATCCTG

HC009\_SP GTGACTGGCGATGCTGTGCGGAATGGACGATCACACTACTCTTCTT

HC010\_SP TTAAGAAATAATCTTCATCTAAAATATACTTCAGTCACCTCCTAGCTGAC

HC011\_SP ATTGATTTGAGTCAGCTAGGAGGTGACTGAAGTATATTTTAGATGAAG  
GAGACCTTTGAGCTTCCGAGACTGGTCTCAGTTTTGGGACCATTCAAAACAGCATAGCTCTAAAACCTCGTAGACTA

HC014\_SP TTTTTGTC  
GAGACCAGTCTCGGAAGCTCAAAGGTCTCGTTTTAGAGCTATGCTGTTTTGAATGGTCCCAAAACTTCAGCACACTG

HC015\_SP AGACTTG

L403 AGTCATCCCAGCAACAAATGG

L409 CGTGGTAAATCGGATAACGTTCCAAGTGAAG

L422 Tgctcttcttcacaaacaaggg

L426 AAGCCAAAGTTTGGCACCACC

L430 GTAGCTTATTCAGTCCTAGTGG

L444 CGTTTGTGTAACATAATGGGTGCAAATTACGAATCTTCTCCTGACG

L445 CGTCAGGAGAAGATTCGTAATTTGCACCCATTAGTTCAACAAACG

L446 GATATTATGGAGCCTATTTTTGTGGGTTTTTAGGCATAAAACTATATG

L447 CATATAGTTTTATGCCTAAAAACcACAAAAATAGGCTCCATAATATC

L448 ATTATTTCTTAATAACTAAAAATATGG

L457 CGTgtacaattgctagcgtacggc

L458 GCACCGGTGATCACTAGTCCTAGG

|      |                                                            |
|------|------------------------------------------------------------|
| L459 | cctaggactagtgatcaccggtGCAAATATGAGCCAAATAAATATAT            |
| L461 | GCCGTACGCTAGCAATTGTACACGTTTGTGAACTAATGGGTGC                |
| L481 | TTCAAATTTTCCCATTTGATTCTCC                                  |
| L488 | CCATATTTTTAGTTATTAAGAAATAATACCAGCCATCAGTCACCTCC            |
| W256 | AGACGATTCAATAGACAATAAGG                                    |
| W286 | GTTTTGGGACCATTCAAACAGCATAGCTCTAAACCTCGTAGAC                |
| W287 | GCTATGCTGTTTTGAATGGTCCCAAAACcattattttaacacacgaggtg         |
| W288 | GCTATGCTGTTTTGAATGGTCCCAAAACGCACCCATTAGTTCAACAAACG         |
| W326 | AATTCTTTTCTTCATCATCGGTC                                    |
| W327 | AAGAAAGAATGAAGATTGTTTCATG                                  |
| W341 | GGTACTAATCAAAATAGTGAGGAGG                                  |
| W354 | GTTTTTCAAATCTGCGGTTGCG                                     |
| W355 | AAAAATTGAAAAAATGGTGAAACAC                                  |
| W356 | ATTTTCGTAAACGGTATCGGTTTCTTTTAAAGTTTTGGGACCATTCAAACAGC      |
| W357 | TTTAAAGAAACCGATACCGTTTACGAAATGTTTTAGAGCTATGCTGTTTTGA       |
| W365 | AAACGGTATCGGTTTCTTTTAAATTC AATTGTTTTGGGACCATTCAAACAGC      |
| W366 | AATTGAATTTAAAAGAAACCGATACCGTTTGTTTTAGAGCTATGCTGTTTTGA      |
| W370 | GTTCTTAAACCAAACCGTATCGGTTTCTTTTAAATTC                      |
| W371 | GAAACCGATACCGTTTTGGTTAAGGAACAGGTAAAGGGCATTTAAC             |
| W376 | CGATTTTCAGCCATTGCCTCGTC                                    |
| W377 | GCCTTTGACGAGGCAATGGCTGAAATCGNNNNNAAAAAGCGCAAGAAGAAATCAAC   |
| W391 | TCCGTACAACCCACAACCCTGCTAGTGAGCGTTTTGGGACCATTCAAACAGC       |
| W392 | GCTCACTAGCAGGGTTGTGGGTTGTACGGAGTTTTAGAGCTATGCTGTTTTGA      |
| W393 | TTGTTGCCACTCTTCCTTCTTTC                                    |
| W397 | CAGGGTTGTGGGTTGTTGCGATGGAGTTAACTCCCATCTCC                  |
| W398 | GGGAGTTAACTCCATCGCAACAACCCACAACCCTGCTAGTG                  |
| W403 | GTGGTATCTATCGTGATGTGAC                                     |
| W404 | TTACCGAAACGGAATTTATCTGC                                    |
| W405 | AAAGCTAGAGTTCCGCAATTGG                                     |
| W431 | GTGGGTTGTACGGATTGAGTTAACTCCCATCTCCTTC                      |
| W432 | GATGGGAGTTAACTCAATCCGTACAACCCACAACCCTG                     |
| W433 | GCTTCACCTATTGCAGCACCAATTGACCACATGAAGATAG                   |
| W434 | GTGGTCAATTGGTGCTGCAATAGGTGAAGCTAATGGTGATG                  |
| W463 | CTGATTTGTATTAATTTTGAAGACATTATGCTTCACCTTC                   |
| W464 | GCATAATGTCTCAAATTAATACAAATCAGTGAAATCATG                    |
| W465 | GTTTTGGGACCATTCAAACAGCATAGCTCTAAACCTGACAGTAATATCAG         |
| W466 | GTTTTAGAGCTATGCTGTTTTGAATGGTCCCAAAACGCTCACTAGCAGGGTTG      |
| W542 | ATACTTTACGCAGCGGAGTTTCGGTTTTgTAGGAGTGGTAGTATATACACGAGTACAT |

**Table S3.** Design of targeting and editing constructs used in this study.

| Edition     | Targeting Constructs                           |           |           |                                           | Editing Constructs |                                           |                                           |                                           |           |                                           | Name of resulting strains | Primers used to verify edited genotype    |
|-------------|------------------------------------------------|-----------|-----------|-------------------------------------------|--------------------|-------------------------------------------|-------------------------------------------|-------------------------------------------|-----------|-------------------------------------------|---------------------------|-------------------------------------------|
|             | Template DNA                                   | Left PCR  | Right PCR | Spacer sequence                           | PAM                | Template DNA                              | PCR A                                     | PCR B                                     | PCR C     | SOEing PCR                                |                           |                                           |
| bgaA R>A    | crR6Kk                                         | W256/W391 | W392/L403 | GCTCACTAGCAGGGTTGTGGGTTGTACCGA            | TGG                | R6                                        | W403/W397                                 | W398/W404                                 | N/A       | W403/W404                                 | JEN56                     | W403/W404                                 |
| bgaA NE>AA  | crR6Rk                                         | W256/W391 | W392/L403 | GCTCACTAGCAGGGTTGTGGGTTGTACCGA            | TGG                | R6                                        | W403/W431                                 | W432/W433                                 | W434/W404 | W403/W404                                 | JEN60                     | W403/W404                                 |
| AbgaA       | crR6Rk                                         | W256/W391 | W392/L403 | GCTCACTAGCAGGGTTGTGGGTTGTACCGA            | TGG                | R6                                        | B255/B256                                 | B257/B258                                 | N/A       | B255/B258                                 | JEN52                     | W393/W405                                 |
| ΔsrtA       | crR6Kc                                         | W256/B218 | B217/L403 | TCCTAGCAGGATTTCTGATAATTACTGTCAC           | TGG                | R6                                        | B230/W463                                 | W464/B229                                 | N/A       | B230/B229                                 | JEN51                     | W422/W426                                 |
| ermB Stop   | crR6Rk                                         | W256/W356 | W357/L403 | TTTAAAAGAAACCGATACCGTTTACGAAAT            | TGG                | JEN38                                     | L422/W370                                 | W371/L426                                 | N/A       | L422/L426                                 | JEN43                     | L457/L458                                 |
| ΔsrtA ΔbgaA | JEN51 (for Left PCR) and JEN52 (for Right PCR) | W256/W465 | W466/W403 | same as the ones used for ΔsrtA and ΔbgaA | TGG                | same as the ones used for ΔsrtA and ΔbgaA | same as the ones used for ΔsrtA and ΔbgaA | same as the ones used for ΔsrtA and ΔbgaA | N/A       | same as the ones used for ΔsrtA and ΔbgaA | JEN64                     | same as the ones used for ΔsrtA and ΔbgaA |
